# Supplementary figures and images for: Influence of charge repulsion on binding strengths: experimental and computational characterization of mixed alkali metal complexes of decamethylcucurbit[5]uril in the gas phase
Source: Royal Society of Chemistry journal article supplement (doi:10.1039/c1cc11090j), 2011-01-01

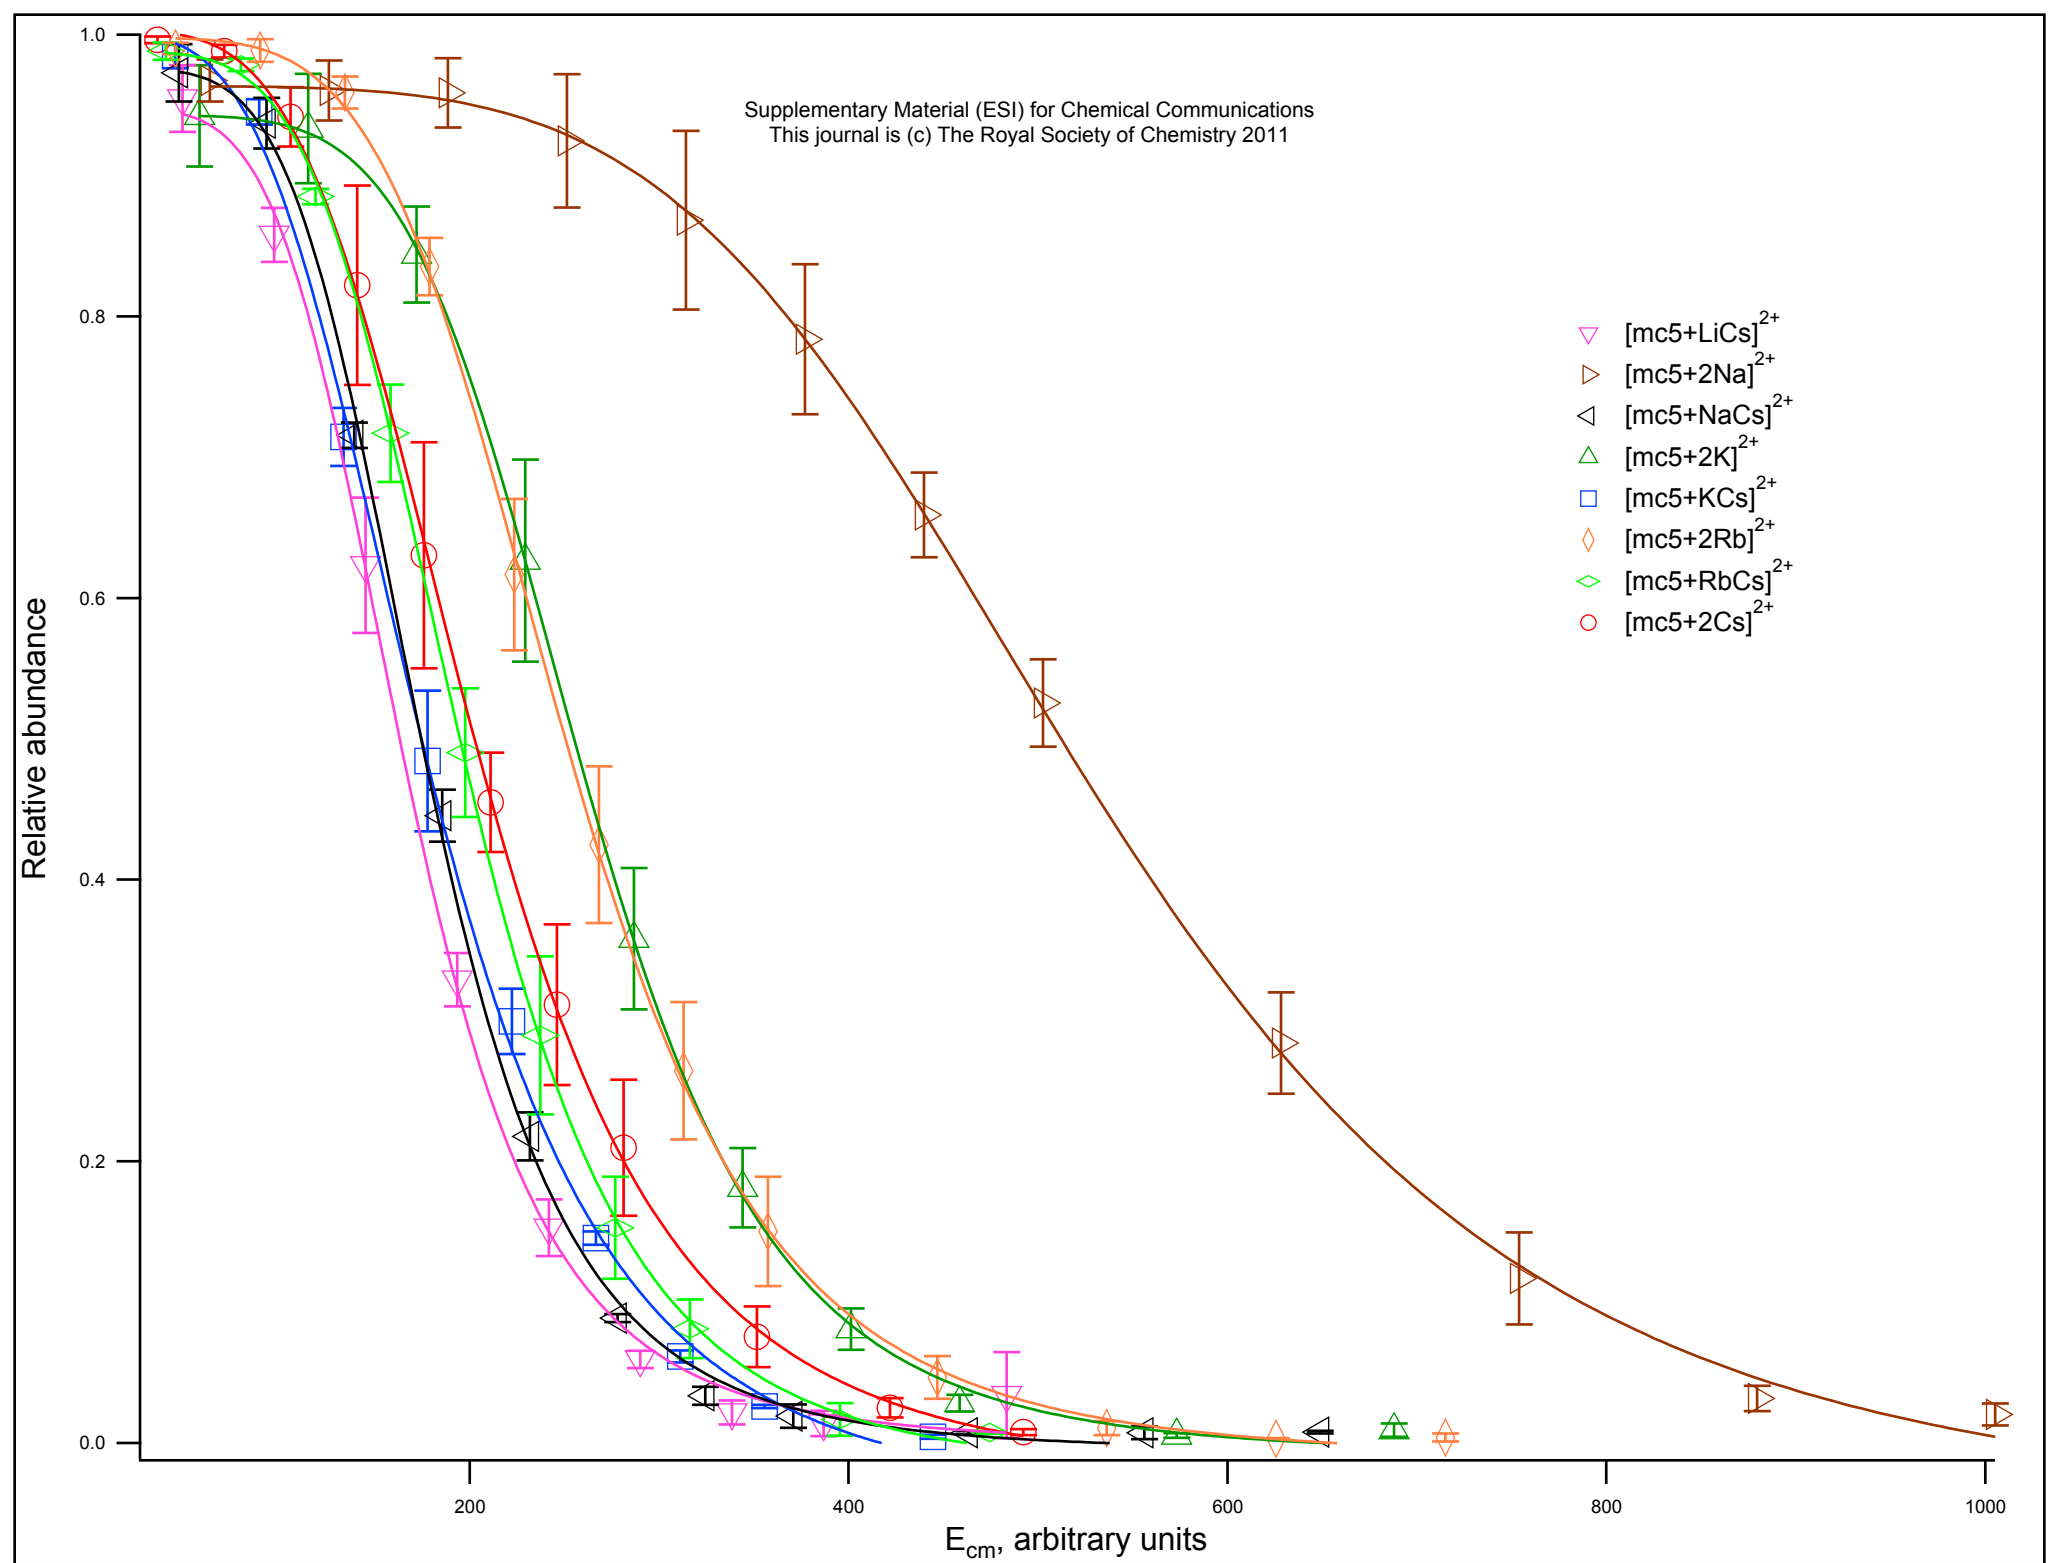

Supplement: c1cc11090j.pdf [file c1cc11090j.pdf]
